# Supplementary material
Source: PubMed Central journal article supplement (PMC5998106)
Supplement: rspb20180727supp2.pdf [file rspb20180727supp2.pdf]

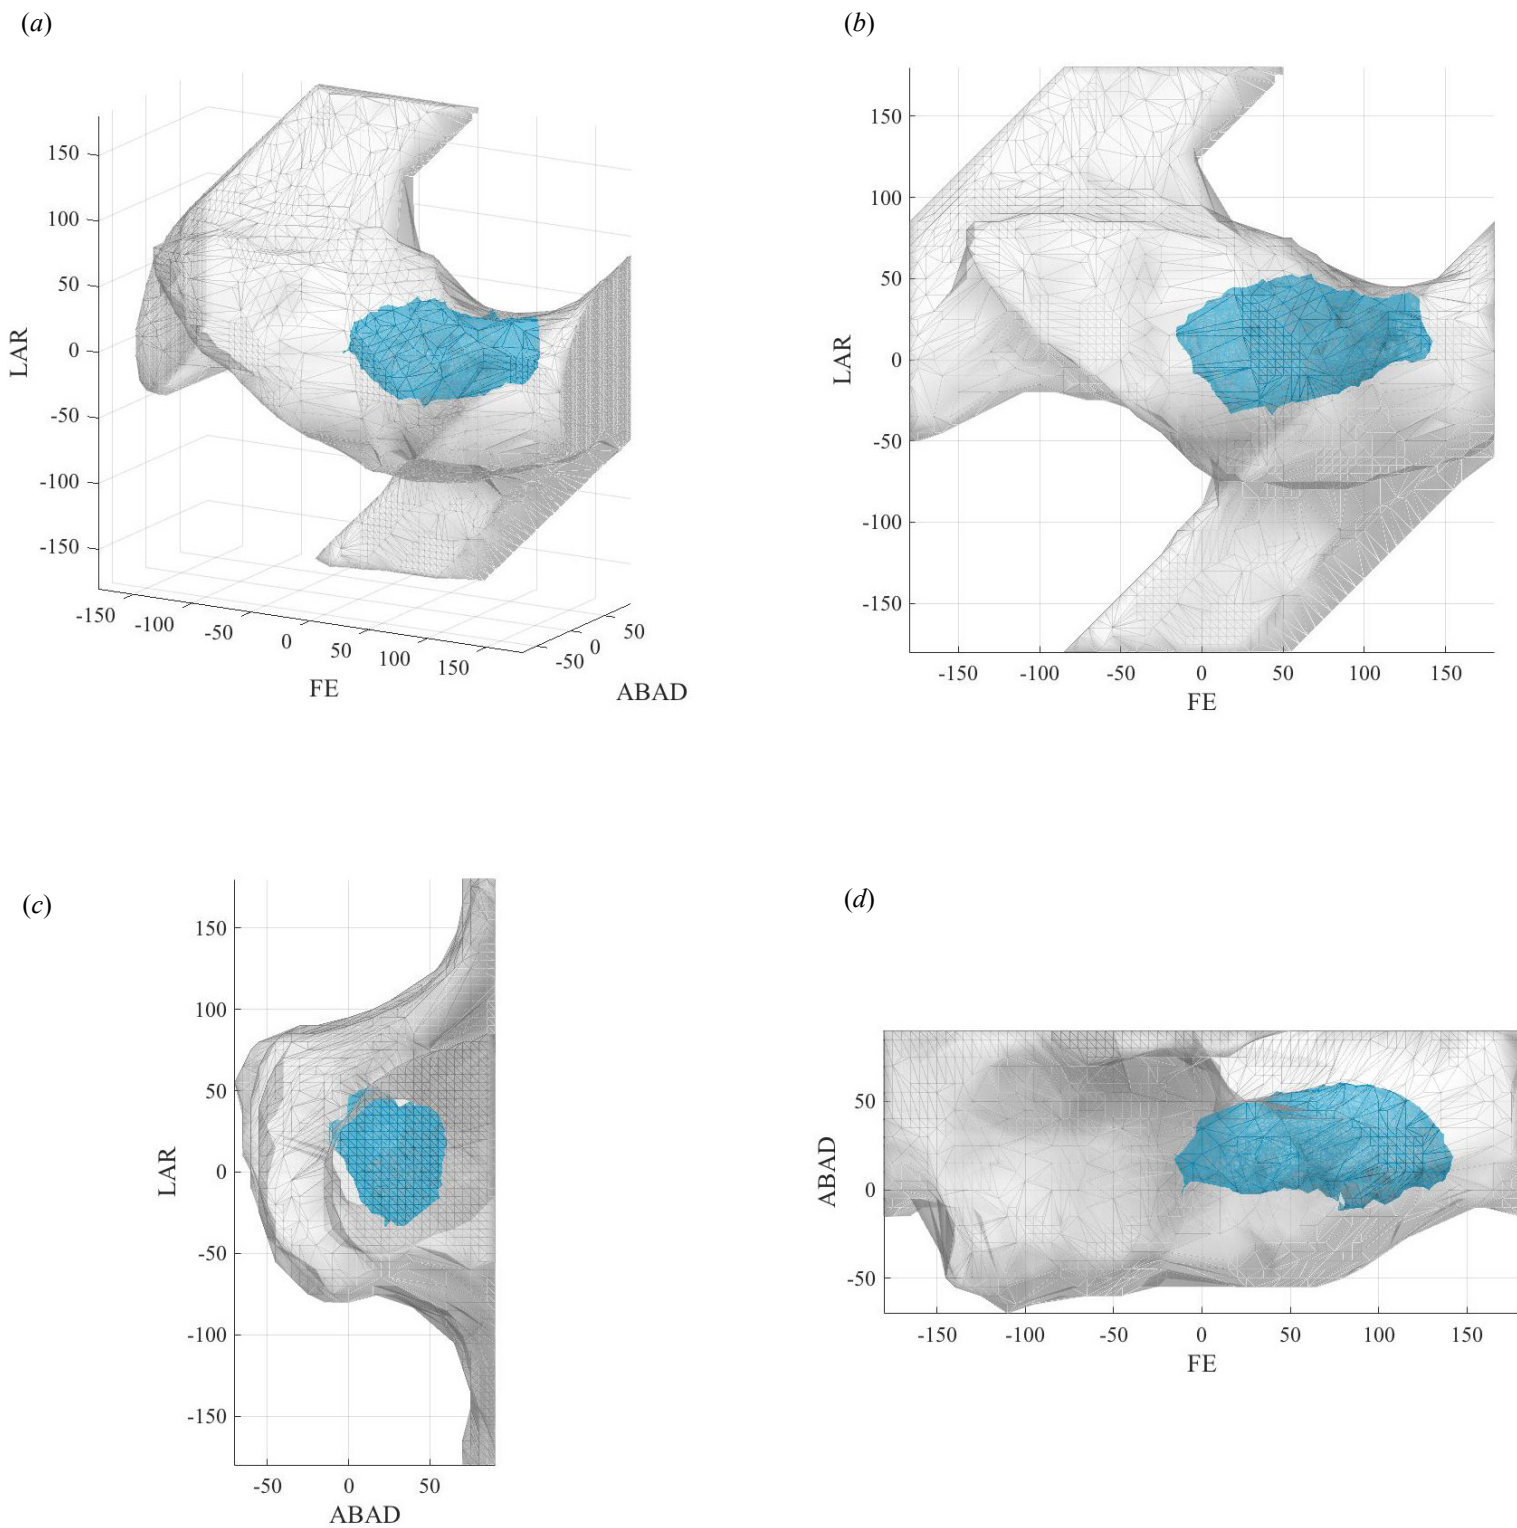

**Figure S2.** Additional views of the ROM map comparison of “osteological” (grey) and “ligamentous” (teal) mobilities from the following (azimuth°, elevation°) viewpoints: (a) (30, 15); (b) (0, 0); (c) (90, 0); and (d) (0, 90).
