# Supplementary material
Source: PubMed Central journal article supplement (PMC5998106)
Supplement: rspb20180727supp4.pdf [file rspb20180727supp4.pdf]

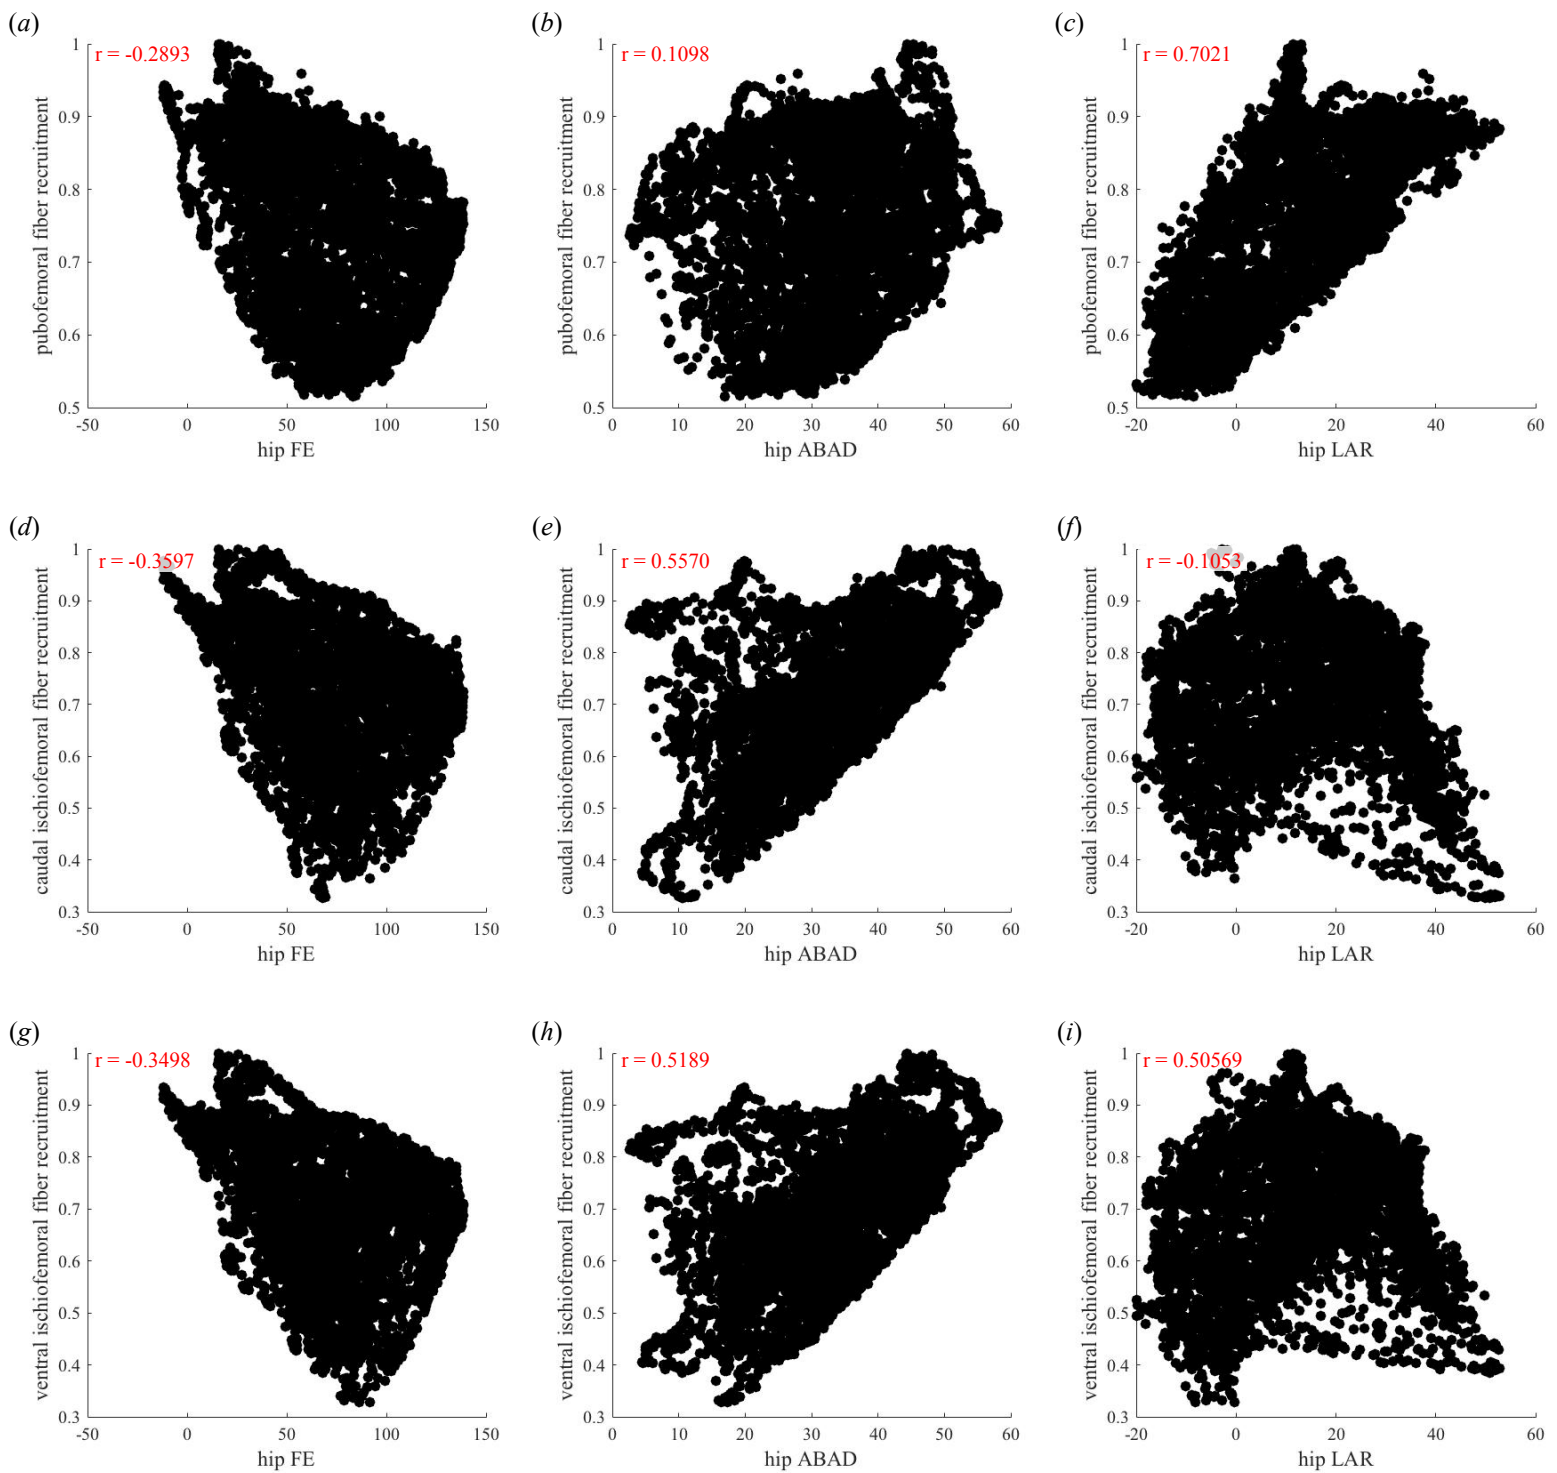

**Figure S4.** Scatterplots demonstrating relationship between the following simulated ligament fiber recruitment values and hip joint rotations, including correlation coefficients: (a) pubofemoral and FE, (b) pubofemoral and ABAD, (c) pubofemoral and LAR, (d) caudal ischiofemoral and FE, (e) caudal ischiofemoral and ABAD, (f) caudal ischiofemoral and LAR, (g) ventral ischiofemoral and FE, (h) ventral ischiofemoral and ABAD, and (i) ventral ischiofemoral and LAR.
